# Supplementary material
Source: MDPI journal article supplement (https://www.mdpi.com/2412-3811/9/4/72)
Supplement: s1 [file s1]

## SUPPLEMENTARY MATERIAL

Table S1: Survey Format and Vehicle Capacities.

### TRAVEL PREFERENCE SURVEYS.

|                                                                                                                                                                   |
|-------------------------------------------------------------------------------------------------------------------------------------------------------------------|
| <p>Excuse me (Mr, Miss, young man), we are working on a survey of public transport users, for study purposes.</p> <p>Could you help us answer some questions?</p> |
|-------------------------------------------------------------------------------------------------------------------------------------------------------------------|

#### I. GENERAL DATA

|                     |  |           |  |             |  |                              |  |
|---------------------|--|-----------|--|-------------|--|------------------------------|--|
| Interview point     |  | Code Zone |  | Survey date |  | Day of the week              |  |
| Name of interviewer |  |           |  |             |  | Survey time: (24 Hrs format) |  |

#### II. INFORMATION ON PUBLIC TRANSPORTATION

|   | ¿ WHERE IT COME FROM?                            |     | PROBLEMS OF THE PUBLIC TRANSPORTATION SERVICE |                                                                                   |     |
|---|--------------------------------------------------|-----|-----------------------------------------------|-----------------------------------------------------------------------------------|-----|
| 1 | District Name                                    | 7   | Compliant with the service                    | 1                                                                                 |     |
|   | Urbanization and/or sector                       |     | High price                                    | 2                                                                                 |     |
|   | Reference point                                  |     | Unsafety                                      | 3                                                                                 |     |
|   | ¿ WHERE IT GOES?                                 |     | Poor condition of the vehicles                | 4                                                                                 |     |
|   | District Name                                    |     | Abuse by driver or collector                  | 5                                                                                 |     |
|   | Urbanization and/or sector                       |     | High delay time                               | 6                                                                                 |     |
|   | Reference point                                  |     | High waiting time                             | 7                                                                                 |     |
| 2 | HOW LONG DOES YOUR TRIP TAKE?                    | min | 8                                             | YOU COULD DO WITHOUT THE PUBLIC TRANSPORTATION SERVICE                            | Yes |
| 3 | HOW MUCH DOES THE TICKET COST YOU (Nuevos soles) | S/. |                                               |                                                                                   | Not |
| 4 | HOW OFTEN DO YOU USE PUBLIC TRANSPORTATION?      |     | 9                                             | WHAT MODES OF TRANSPORTATION WOULD YOU USE IF PUBLIC TRANSPORTATION DIDN'T EXIST? |     |
|   | Diary                                            | 1   |                                               | Mototaxis                                                                         | 1   |
|   | 2 times per week                                 | 2   |                                               | Collective car                                                                    | 2   |
|   | 3 times a week                                   | 3   |                                               | Private Car                                                                       | 3   |
|   | Biweekly                                         | 4   |                                               | Hike                                                                              | 4   |
|   | Monthly                                          | 5   |                                               | Others                                                                            | 5   |
|   | Occasional                                       | 6   |                                               |                                                                                   |     |
| 5 | WHAT IS YOUR REASON FOR TRAVEL?                  |     | 10                                            | HOW OLD ARE YOU?                                                                  |     |
|   | Job                                              | 1   |                                               | Less than 15 years                                                                | 1   |
|   | Study                                            | 2   |                                               | 15 to 24 years                                                                    | 2   |
|   |                                                  |     |                                               | 25 to 34 years                                                                    | 3   |

|   |                                                                  |  |   |    |                            |  |   |
|---|------------------------------------------------------------------|--|---|----|----------------------------|--|---|
|   | Shopping                                                         |  | 3 |    | 35 to 44 years             |  | 4 |
|   | Health                                                           |  | 4 |    | 45 to 54 years             |  | 5 |
|   | To home                                                          |  | 5 |    |                            |  |   |
|   | Tourism                                                          |  | 6 |    | 55 to 64 years             |  | 6 |
|   | Others (specify)                                                 |  | 7 |    | 65 to more years           |  | 7 |
| 6 | <b>HOW WOULD YOU RATE THE PUBLIC<br/>TRANSPORTATION SERVICE?</b> |  |   | 11 | <b>FAMILY INCOME RANGE</b> |  |   |
|   | Well                                                             |  | 1 |    | From 900 to 1200 soles     |  | 1 |
|   | Regular                                                          |  | 2 |    | From 1200 to 2000 soles    |  | 2 |
|   | Bad                                                              |  | 3 |    | From 2000 to 3000 soles    |  | 3 |
|   | Very bad                                                         |  | 4 |    | From 3000 soles to more    |  | 4 |

Origin and destination matrix Calibrated with population growth data, in the upper and left part, the transit areas are identified and in the central part the number of trips.

Table S2: Origin and destination matrix .

|    | 1    | 2     | 3    | 4   | 5    | 6    | 7    | 8   | 9    | 10   | 11   | 12   | 13   | 14   | 15   | 17  | 18   | 19   | 20   | 21   | 22  | 23   | 27   | 28   | 29   | 30   | 31   | 32   |
|----|------|-------|------|-----|------|------|------|-----|------|------|------|------|------|------|------|-----|------|------|------|------|-----|------|------|------|------|------|------|------|
| 1  | 0    | 3592  | 3592 | 0   | 5388 | 0    | 0    | 0   | 0    | 3592 | 0    | 0    | 0    | 0    | 0    | 0   | 0    | 0    | 1796 | 0    | 0   | 0    | 0    | 0    | 0    | 0    | 0    | 0    |
| 2  | 0    | 3617  | 2170 | 0   | 2894 | 2170 | 0    | 0   | 1447 | 1447 | 723  | 2170 | 2170 | 0    | 0    | 0   | 362  | 0    | 0    | 0    | 0   | 0    | 723  | 1447 | 723  | 0    | 0    | 723  |
| 3  | 4450 | 5340  | 1780 | 0   | 1780 | 0    | 890  | 0   | 0    | 1780 | 0    | 0    | 0    | 0    | 0    | 0   | 0    | 0    | 0    | 0    | 0   | 0    | 0    | 0    | 0    | 0    | 0    | 0    |
| 4  | 0    | 0     | 0    | 646 | 0    | 0    | 0    | 0   | 646  | 0    | 0    | 0    | 0    | 0    | 0    | 0   | 0    | 0    | 0    | 0    | 0   | 0    | 0    | 0    | 0    | 0    | 0    | 0    |
| 5  | 2018 | 1615  | 404  | 0   | 404  | 404  | 0    | 404 | 404  | 807  | 807  | 807  | 1615 | 0    | 1211 | 0   | 0    | 0    | 0    | 0    | 404 | 0    | 404  | 807  | 0    | 404  | 202  | 0    |
| 6  | 0    | 1927  | 0    | 0   | 1445 | 0    | 0    | 0   | 0    | 0    | 1927 | 0    | 0    | 0    | 0    | 0   | 241  | 0    | 0    | 0    | 0   | 0    | 0    | 0    | 0    | 0    | 0    | 0    |
| 7  | 0    | 5297  | 0    | 0   | 8828 | 0    | 0    | 0   | 441  | 0    | 0    | 0    | 0    | 0    | 0    | 0   | 883  | 0    | 0    | 0    | 0   | 0    | 0    | 0    | 1766 | 0    | 0    | 0    |
| 8  | 0    | 4252  | 0    | 0   | 0    | 0    | 0    | 0   | 1417 | 0    | 472  | 0    | 1890 | 0    | 472  | 0   | 0    | 0    | 0    | 0    | 0   | 0    | 0    | 0    | 0    | 0    | 0    | 0    |
| 9  | 0    | 9856  | 0    | 0   | 7884 | 0    | 0    | 0   | 1971 | 0    | 0    | 0    | 1971 | 0    | 0    | 0   | 0    | 0    | 0    | 0    | 0   | 1971 | 0    | 0    | 0    | 0    | 0    | 0    |
| 10 | 0    | 12698 | 0    | 0   | 6349 | 0    | 0    | 0   | 0    | 0    | 0    | 0    | 0    | 0    | 0    | 0   | 0    | 0    | 0    | 0    | 0   | 0    | 0    | 0    | 0    | 0    | 0    | 0    |
| 11 | 0    | 4320  | 0    | 0   | 4320 | 0    | 0    | 0   | 0    | 0    | 0    | 0    | 0    | 0    | 0    | 0   | 0    | 0    | 0    | 0    | 0   | 0    | 0    | 0    | 0    | 0    | 0    | 0    |
| 12 | 0    | 1959  | 979  | 0   | 0    | 0    | 0    | 0   | 979  | 0    | 0    | 0    | 979  | 0    | 0    | 0   | 0    | 0    | 0    | 0    | 0   | 0    | 0    | 979  | 0    | 0    | 0    | 0    |
| 13 | 987  | 1973  | 3946 | 0   | 3946 | 0    | 1973 | 0   | 0    | 1973 | 987  | 0    | 3946 | 0    | 0    | 0   | 1973 | 0    | 0    | 0    | 0   | 0    | 1973 | 987  | 0    | 0    | 987  | 0    |
| 14 | 1670 | 0     | 0    | 0   | 3341 | 0    | 0    | 0   | 0    | 0    | 0    | 0    | 0    | 0    | 0    | 0   | 0    | 0    | 0    | 0    | 0   | 0    | 0    | 0    | 0    | 0    | 0    | 0    |
| 15 | 0    | 1056  | 528  | 0   | 528  | 0    | 0    | 0   | 1585 | 0    | 1056 | 0    | 0    | 0    | 528  | 0   | 0    | 0    | 0    | 0    | 0   | 0    | 1056 | 1056 | 0    | 0    | 0    | 0    |
| 16 | 0    | 0     | 0    | 0   | 655  | 1309 | 0    | 0   | 0    | 0    | 0    | 0    | 0    | 0    | 0    | 0   | 0    | 0    | 0    | 0    | 0   | 0    | 0    | 0    | 0    | 0    | 0    | 0    |
| 17 | 0    | 3333  | 0    | 0   | 3333 | 0    | 0    | 0   | 0    | 0    | 0    | 0    | 0    | 0    | 0    | 0   | 9166 | 1667 | 0    | 0    | 0   | 0    | 0    | 0    | 0    | 0    | 0    | 0    |
| 18 | 0    | 888   | 0    | 0   | 888  | 0    | 0    | 0   | 0    | 0    | 0    | 0    | 0    | 0    | 0    | 0   | 7105 | 5329 | 0    | 0    | 0   | 0    | 0    | 0    | 0    | 0    | 0    | 0    |
| 19 | 0    | 6283  | 0    | 0   | 2856 | 0    | 0    | 0   | 0    | 0    | 0    | 0    | 0    | 0    | 0    | 0   | 2285 | 0    | 571  | 571  | 0   | 0    | 0    | 571  | 0    | 0    | 1142 | 0    |
| 20 | 0    | 0     | 0    | 0   | 0    | 0    | 0    | 0   | 0    | 2672 | 0    | 0    | 0    | 0    | 0    | 0   | 0    | 0    | 0    | 0    | 0   | 1782 | 0    | 0    | 0    | 0    | 0    | 0    |
| 21 | 0    | 825   | 0    | 0   | 0    | 0    | 0    | 0   | 0    | 0    | 0    | 0    | 0    | 0    | 0    | 0   | 825  | 0    | 0    | 0    | 0   | 0    | 0    | 0    | 0    | 0    | 0    | 825  |
| 22 | 0    | 2466  | 0    | 0   | 822  | 0    | 0    | 0   | 0    | 0    | 0    | 0    | 0    | 0    | 0    | 0   | 0    | 0    | 0    | 0    | 0   | 0    | 0    | 0    | 0    | 0    | 0    | 0    |
| 23 | 0    | 791   | 0    | 0   | 2373 | 0    | 0    | 0   | 0    | 0    | 0    | 0    | 0    | 0    | 0    | 0   | 791  | 0    | 0    | 0    | 0   | 791  | 0    | 0    | 0    | 0    | 0    | 791  |
| 24 | 0    | 2522  | 0    | 0   | 4203 | 0    | 0    | 0   | 0    | 0    | 0    | 0    | 0    | 0    | 0    | 0   | 0    | 0    | 0    | 0    | 0   | 0    | 0    | 0    | 0    | 0    | 0    | 0    |
| 25 | 0    | 1692  | 0    | 0   | 1692 | 0    | 0    | 0   | 846  | 0    | 846  | 0    | 0    | 0    | 0    | 0   | 846  | 0    | 0    | 0    | 0   | 0    | 0    | 0    | 0    | 0    | 0    | 2538 |
| 26 | 0    | 7789  | 0    | 0   | 3116 | 0    | 0    | 0   | 0    | 0    | 0    | 0    | 779  | 0    | 0    | 0   | 779  | 0    | 0    | 0    | 0   | 0    | 779  | 0    | 0    | 0    | 0    | 0    |
| 27 | 0    | 0     | 0    | 0   | 4722 | 0    | 0    | 0   | 0    | 0    | 0    | 0    | 0    | 0    | 0    | 0   | 0    | 0    | 0    | 0    | 0   | 0    | 0    | 0    | 0    | 0    | 0    | 0    |
| 28 | 0    | 0     | 0    | 0   | 7284 | 0    | 0    | 0   | 0    | 0    | 0    | 0    | 0    | 0    | 0    | 0   | 0    | 0    | 0    | 0    | 0   | 0    | 0    | 0    | 0    | 0    | 0    | 0    |
| 29 | 0    | 2073  | 0    | 0   | 4146 | 0    | 0    | 0   | 0    | 0    | 691  | 0    | 0    | 0    | 0    | 0   | 0    | 0    | 0    | 0    | 0   | 0    | 0    | 0    | 0    | 691  | 691  | 0    |
| 30 | 0    | 2133  | 0    | 0   | 1067 | 0    | 0    | 0   | 0    | 0    | 1067 | 0    | 0    | 0    | 0    | 0   | 1067 | 0    | 0    | 1067 | 0   | 0    | 0    | 0    | 0    | 0    | 0    | 1067 |
| 31 | 767  | 3068  | 0    | 0   | 4602 | 0    | 0    | 0   | 0    | 0    | 0    | 0    | 767  | 2301 | 0    | 767 | 0    | 0    | 0    | 0    | 0   | 0    | 767  | 0    | 0    | 767  | 0    | 767  |
| 32 | 0    | 1268  | 0    | 0   | 5073 | 0    | 0    | 0   | 0    | 0    | 0    | 0    | 634  | 0    | 0    | 0   | 0    | 0    | 0    | 0    | 0   | 0    | 0    | 0    | 1902 | 1902 | 0    | 0    |

Below is shown the demand of users of the system, frequencies and number of buses.

Table S3: Green Route:

| SENSE  | N° | STOPPING AREAS | GOES UP | LOW  | PASSENGERS ON BOARD |
|--------|----|----------------|---------|------|---------------------|
| RETURN | 1  | 4              | 323     | 162  | 162                 |
|        | 2  | 15,16          | 1875    | 0    | 2036                |
|        | 3  | 9, 8           | 4138    | 558  | 5616                |
|        | 4  | 12,13          | 4922    | 1930 | 8608                |
|        | 5  | 1, 5, 6        | 3264    | 5134 | 6738                |
|        | 6  | 3,7            | 445     | 3233 | 3950                |
|        | 8  | 10             | 0       | 2038 | 1912                |
|        | 9  | 11             | 0       | 1912 | 0                   |
|        | 10 | 14             | 0       | 0    | 0                   |
|        | 11 | 30             | 0       | 0    | 0                   |

|                        |        |        |       |           |
|------------------------|--------|--------|-------|-----------|
| SPEED=                 | 20 KPH | LENGTH | FLOAT | FREQUENCY |
| REGULAR URBAN SERVICE  |        | 5.57   | 15    | 4.07      |
| SERVICE CENTER         |        | 3      | 12    | 5.20      |
| CENTER-AIRPORT SERVICE |        | 3.15   | 7     | 8.87      |
| EAST-WEST DIRECTION    |        |        | 33    |           |

Table S4: Orange Route:

| SENSE  | N° | STOPPING AREAS | GOES UP | LOW  | PASSENGERS ON BOARD |
|--------|----|----------------|---------|------|---------------------|
| RETURN | 1  | 4              | 323     | 162  | 162                 |
|        | 2  | 15,16          | 1187    | 0    | 1348                |
|        | 3  | 9, 8           | 2628    | 690  | 3287                |
|        | 4  | 12,13          | 2713    | 0    | 6000                |
|        | 5  | 1, 5, 6        | 2301    | 3022 | 5278                |
|        | 5  | 2              | 0       | 0    | 5278                |
|        | 8  | 3,7            | 445     | 2972 | 2751                |
|        | 9  | 10             | 0       | 2038 | 713                 |
|        | 10 | 11             | 0       | 713  | 0                   |
|        | 11 | 14             | 0       | 0    | 0                   |
|        | 12 | 30             | 0       | 0    | 0                   |

|                        |        |        |       |           |
|------------------------|--------|--------|-------|-----------|
| SPEED=                 | 20 KPH | LENGTH | FLOAT | FREQUENCY |
| REGULAR URBAN SERVICE  |        | 6.4    | 6     | 10.66     |
| SERVICE CENTER         |        | 3.4    | 10    | 5.84      |
| CENTER-AIRPORT SERVICE |        | 3.15   | 9     | 6.64      |
| EAST-WEST DIRECTION    |        |        | 25    |           |

Table S5: Aquamarine Route:

| SENSE  | N° | STOPPING AREAS | GOES UP | LOW  | PASSENGERS ON BOARD |
|--------|----|----------------|---------|------|---------------------|
| RETURN | 1  | 4              | 323     | 162  | 162                 |
|        | 2  | 15,16          | 2931    | 0    | 3093                |
|        | 3  | 9, 8           | 8389    | 558  | 10924               |
|        | 4  | 12,13          | 7624    | 1930 | 16618               |
|        | 5  | 1, 5, 6        | 3264    | 7347 | 12536               |
|        | 6  | 2              | 0       | 5308 | 7228                |
|        | 6  | 3,7            | 445     | 3722 | 9258                |
|        | 8  | 10             | 0       | 2038 | 7220                |
|        | 9  | 11             | 0       | 1912 | 5308                |
|        | 11 | 30             | 0       | 0    | 5308                |

|                        |        |        |       |           |
|------------------------|--------|--------|-------|-----------|
| SPEED=                 | 20 KPH | LENGTH | FLOAT | FREQUENCY |
| REGULAR URBAN SERVICE  |        | 6.4    | 19    | 3.21      |
| SERVICE CENTER         |        | 3.4    | 28    | 2.11      |
| CENTER-AIRPORT SERVICE |        | 3.4    | 21    | 2.79      |
| EAST-WEST DIRECTION    |        |        | 69    |           |

Table S6: Dwelling Route:

| SENSE  | N° | STOPPING AREAS | GOES UP | LOW   | PASSENGERS ON BOARD |
|--------|----|----------------|---------|-------|---------------------|
| RETURN | 1  | 4              | 0       | 0     | 0                   |
|        | 2  | 15, 16         | 2113    | 0     | 2113                |
|        | 3  | 9, 8           | 14107   | 792   | 15428               |
|        | 4  | 12,13          | 2713    | 0     | 18141               |
|        | 5  | 1, 5, 6        | 3300    | 0     | 21440               |
|        | 5  | 2              | 0       | 17137 | 4304                |
|        | 8  | 3,7            | 445     | 1998  | 2751                |
|        | 9  | 10             | 0       | 2038  | 713                 |
|        | 10 | 11             | 0       | 713   | 0                   |
|        | 11 | 14             | 0       | 0     | 0                   |
|        | 12 | 30             | 0       | 0     | 0                   |

|                        |        |        |       |           |
|------------------------|--------|--------|-------|-----------|
| SPEED=                 | 20 KPH | LENGTH | FLOAT | FREQUENCY |
| REGULAR URBAN SERVICE  |        | 6.4    | 26    | 2.27      |
| SERVICE CENTER         |        | 3.4    | 31    | 1.93      |
| CENTER-AIRPORT SERVICE |        | 0.17   | 37    | 1.63      |
| EAST-WEST DIRECTION    |        |        | 94    |           |

Table S7: Pink Route:

| SENSE  | N° | STOPPING AREAS | GOES UP  | LOW      | PASSENGERS ON BOARD |
|--------|----|----------------|----------|----------|---------------------|
| RETURN | 1  | 26             | 0.00     | 0.00     | 0                   |
|        | 2  | 17             | 0.00     | 0.00     | 0                   |
|        | 3  | 18             | 0.00     | 0.00     | 0                   |
|        | 4  | 25             | 0.00     | 0.00     | 0                   |
|        | 5  | 4              | 0.00     | 0.00     | 0                   |
|        | 6  | 19             | 0.00     | 0.00     | 0                   |
|        | 7  | 29             | 0.00     | 0.00     | 0                   |
|        | 8  | 28             | 0.00     | 0.00     | 0                   |
|        | 9  | 22             | 3288.00  | 0.00     | 3288                |
|        | 10 | 21             | 824.89   | 0.00     | 4113                |
|        | 11 | 20             | 2672.40  | 0.00     | 6785                |
|        | 12 | 23             | 45565.05 | 0.00     | 52350               |
|        | 13 | 4              | 0.00     | 0.00     | 52350               |
|        | 14 | 15,16          | 0.00     | 0.00     | 52350               |
|        | 15 | 9, 8           | 0.00     | 846.00   | 51504               |
|        | 16 | 13             | 0.00     | 778.94   | 50725               |
|        | 17 | 5              | 0.00     | 28357.91 | 22367               |
|        | 18 | 1              | 0.00     | 0.00     | 22367               |
|        | 19 | 2              | 0.00     | 18158.16 | 4209                |
|        | 20 | 3              | 0.00     | 0.00     | 4209                |
|        | 21 | 10             | 0.00     | 0.00     | 4209                |
|        | 22 | 11             | 0.00     | 4209.32  | 0                   |
|        | 23 | 14             | 0.00     | 0.00     | 0                   |
|        | 24 | 30             | 0.00     | 0.00     | 0                   |

|                        |        |        |       |           |
|------------------------|--------|--------|-------|-----------|
| SPEED=                 | 20 KPH | LENGTH | FLOAT | FREQUENCY |
| AMARILIS-ESPERANZA URB |        | 4.736  | 90    | 0.67      |
| SERVICE CENTER         |        | 2.45   | 88    | 0.68      |
| EAST-WEST DIRECTION    |        |        | 178   |           |

Table S8: Trunk Route:

| SENSE  | N°    | STOPPING AREAS | GOES UP | LOW  | PASSENGERS ON BOARD |
|--------|-------|----------------|---------|------|---------------------|
| RETURN |       |                |         |      |                     |
|        | 1.00  | 21             | 1650    | 0    | 1650                |
|        | 2.00  | 23             | 2373    | 0    | 4023                |
|        | 3.00  | 20             | 0       | 0    | 4023                |
|        | 4.00  | 27             | 0       | 791  | 3232                |
|        | 5.00  | 28             | 0       | 0    | 3232                |
|        | 6.00  | 19             | 2285    | 1616 | 3901                |
|        | 7.00  | 24             | 0       | 0    | 3901                |
|        | 8.00  | 25,18          | 2538    | 1142 | 5296                |
|        | 9.00  | 26,17          | 0       | 0    | 5296                |
|        | 10.00 | 31             | 0       | 1142 | 4154                |
|        | 11.00 | 32             | 0       | 4154 | 0                   |

|                         |        |        |       |           |
|-------------------------|--------|--------|-------|-----------|
| SPEED=                  | 20 KPH | LENGTH | FLOAT | FREQUENCY |
| SERVICE CENTER          |        | 9.37   | 9     | 6.62      |
| SERVICE CENTER- ESPERAN |        | 6.77   | 9     | 6.62      |
| EAST-WEST DIRECTION     |        |        | 18    |           |

Table S9: Cherry Route:

| SENSE  | N°   | STOPPING AREAS | GOES UP | LOW     | PASSENGERS ON BOARD |
|--------|------|----------------|---------|---------|---------------------|
| RETURN | 1.00 | 30             | 2978    | 0.00    | 2978                |
|        | 2.00 | 32             | 951     | 1790.04 | 2140                |
|        | 3.00 | 31             | 0       | 2139.54 | 0                   |

|                       |        |        |       |           |
|-----------------------|--------|--------|-------|-----------|
| SPEED=                | 20 KPH | LENGTH | FLOAT | FREQUENCY |
| REGULAR URBAN SERVICE |        | 3.62   | 5     | 11.76     |
| EAST-WEST DIRECTION   |        |        | 5     |           |
